# Supplementary material for: Microsatellite loci for Urochloa decumbens (Stapf) R.D. Webster and cross-amplification in other Urochloa species
Source: BMC Res Notes. 2016 Mar 10;9:152. doi: 10.1186/s13104-016-1967-9 (PMC4785737; doi:10.1186/s13104-016-1967-9)
Supplement: Supplementary file 3 — 10.1186/s13104-016-1967-9 Jaccard’s coefficient for 34 genotypes of Urochloa spp. evaluated using 82 microsatellite markers. Individuals are identified according to their EBC codes (Table 1). [file 13104_2016_1967_MOESM3_ESM.xlsx]

## Sheet: Plan1
Additional File 3. Jaccard´s coefficient for 34 genotypes of Urochloa spp. evaluated using 82 microsatellite markers. Individuals are identified according to their EBC code (Table 1)
	D005	D006	D007	D008	D009	D010	D011	D014	D024	D028	D032	D035	D036	D040	D059	D061	D070	D077	D24/27	D062	R10	R44	R125	R144	R146	R182	DT157	DT159	R044	R102	B112	B178	H016	H126
D005	0.000000
D006	0.335512	0.000000
D007	0.374849	0.455232	0.000000
D008	0.368313	0.389930	0.366600	0.000000
D009	0.477235	0.528075	0.474104	0.316294	0.000000
D010	0.522600	0.481765	0.428154	0.434524	0.160001	0.000000
D011	0.467568	0.461683	0.466872	0.284697	0.337473	0.372969	0.000000
D014	0.503524	0.475014	0.419850	0.434275	0.175821	0.092638	0.360681	0.000000
D024	0.479914	0.400813	0.482937	0.423288	0.480064	0.390555	0.416197	0.364198	0.000000
D028	0.409698	0.363849	0.450316	0.405677	0.419711	0.346967	0.383850	0.340948	0.203542	0.000000
D032	0.490789	0.427824	0.440839	0.416613	0.438241	0.355207	0.409520	0.374667	0.342652	0.314986	0.000000
D035	0.442177	0.444771	0.453969	0.410494	0.401706	0.360176	0.378533	0.356662	0.425707	0.331802	0.329749	0.000000
D036	0.425112	0.415979	0.344051	0.115704	0.318853	0.401205	0.282543	0.407867	0.431823	0.377522	0.387177	0.418750	0.000000
D040	0.411487	0.358668	0.409322	0.391827	0.442125	0.436953	0.371107	0.409503	0.403332	0.316847	0.312331	0.347735	0.359177	0.000000
D059	0.365304	0.427991	0.363660	0.130054	0.358198	0.428154	0.301734	0.427824	0.462627	0.395762	0.403096	0.397168	0.092638	0.411673	0.000000
D061	0.413528	0.452776	0.381665	0.169253	0.347912	0.402857	0.330188	0.409503	0.480322	0.415649	0.418893	0.435640	0.141001	0.438258	0.097128	0.000000
D070	0.409907	0.447305	0.388838	0.159978	0.368182	0.388079	0.300927	0.423853	0.454955	0.423853	0.425415	0.415413	0.104577	0.422836	0.078783	0.127364	0.000000
D077	0.498245	0.479140	0.452468	0.447223	0.423177	0.398819	0.392240	0.401457	0.514648	0.414919	0.360666	0.383119	0.414051	0.397168	0.411059	0.430631	0.378533	0.000000
D24/27	0.490611	0.444671	0.493377	0.448425	0.527796	0.414879	0.471262	0.421730	0.166193	0.281613	0.359192	0.466538	0.411856	0.428234	0.412569	0.420771	0.369930	0.445835	0.000000
D062	0.411487	0.437028	0.376454	0.176453	0.367493	0.400438	0.314260	0.414221	0.482996	0.427908	0.430760	0.417215	0.140928	0.424494	0.119712	0.170542	0.120531	0.430947	0.454516	0.000000
R10	0.405904	0.443436	0.388514	0.150621	0.372136	0.409520	0.317641	0.427824	0.424596	0.403299	0.403096	0.404476	0.109326	0.389612	0.082982	0.141931	0.076413	0.38241	0.37378	0.060858	0.000000
R44	0.446098	0.448572	0.445963	0.312052	0.470662	0.393029	0.379655	0.402857	0.279506	0.354145	0.390245	0.454955	0.264224	0.416918	0.270212	0.278166	0.225157	0.405366	0.160672	0.247411	0.191623	0.000000
R125	0.454056	0.429389	0.453715	0.302518	0.431994	0.411059	0.383119	0.402857	0.276488	0.336803	0.445963	0.474641	0.272448	0.455046	0.294704	0.309716	0.281452	0.484685	0.194709	0.233179	0.229186	0.185373	0.000000
R144	0.477235	0.503936	0.488475	0.326681	0.461548	0.417068	0.392240	0.447390	0.299406	0.356137	0.410685	0.469464	0.280135	0.457731	0.286892	0.298498	0.249599	0.444623	0.187597	0.245744	0.230318	0.165142	0.162545	0.000000
R146	0.434360	0.476048	0.469279	0.312796	0.432049	0.411243	0.426079	0.433137	0.289490	0.344287	0.423288	0.482391	0.292149	0.447223	0.295536	0.326681	0.279303	0.442085	0.212176	0.228706	0.227509	0.155570	0.168391	0.179646	0.000000
R182	0.459574	0.469841	0.459085	0.299326	0.448572	0.434484	0.376843	0.458066	0.276260	0.317257	0.373171	0.462627	0.278455	0.406786	0.266901	0.322880	0.244928	0.451013	0.199277	0.232616	0.225714	0.173805	0.220141	0.193464	0.131757	0.000000
DT157	0.648748	0.629518	0.597808	0.578998	0.593437	0.446098	0.584263	0.445963	0.535990	0.483785	0.496716	0.443354	0.575277	0.466374	0.602726	0.641073	0.578998	0.490123	0.523005	0.602726	0.548165	0.621654	0.614580	0.652765	0.612130	0.566244	0.000000
DT159	0.549112	0.566130	0.630028	0.602075	0.624881	0.495268	0.554655	0.517762	0.585673	0.493892	0.500405	0.431300	0.573342	0.513884	0.563082	0.643516	0.584002	0.467715	0.571605	0.571605	0.547212	0.618131	0.599893	0.654767	0.546321	0.538079	0.070167	0.000000
R044	0.510495	0.426658	0.358683	0.465657	0.497091	0.442125	0.419579	0.434275	0.473242	0.516534	0.398025	0.476513	0.471661	0.456588	0.443403	0.464588	0.451211	0.486705	0.448425	0.433330	0.443403	0.444647	0.456185	0.524109	0.425895	0.445963	0.456384	0.487246	0.000000
R102	0.529006	0.486183	0.491637	0.551208	0.554802	0.506816	0.505921	0.526527	0.476751	0.495486	0.434232	0.497082	0.528221	0.435537	0.525338	0.584061	0.522037	0.524757	0.455138	0.529579	0.534188	0.504362	0.503936	0.533541	0.479140	0.497855	0.410301	0.435835	0.327486	0.000000
B112	0.563806	0.537876	0.551290	0.493725	0.514623	0.431776	0.523669	0.437201	0.535990	0.570258	0.557368	0.563922	0.478702	0.532732	0.491138	0.563922	0.508682	0.484139	0.589843	0.514623	0.514495	0.571605	0.618495	0.576849	0.538867	0.570319	0.459085	0.432665	0.488779	0.545684	0.000000
B178	0.566579	0.523969	0.538980	0.511327	0.521602	0.427109	0.497072	0.408831	0.468685	0.512883	0.502009	0.517018	0.508268	0.508479	0.510327	0.526772	0.529649	0.541869	0.492705	0.523821	0.519285	0.510824	0.529006	0.509656	0.488364	0.519296	0.448572	0.465738	0.470173	0.402492	0.267947	0.000000
H016	0.646164	0.691261	0.574339	0.607033	0.762878	0.711681	0.650108	0.680262	0.607033	0.540323	0.668513	0.653879	0.639524	0.547431	0.746303	0.698668	0.698668	0.653879	0.584705	0.653879	0.627186	0.698668	0.658455	0.698668	0.683439	0.611614	0.275793	0.378628	0.571605	0.601285	0.493995	0.554983	0.000000
H126	0.566750	0.589047	0.475730	0.553199	0.635473	0.673456	0.599321	0.619430	0.619430	0.505140	0.620803	0.623228	0.531860	0.566884	0.599321	0.599321	0.600089	0.660580	0.576153	0.542691	0.509068	0.647921	0.567010	0.623228	0.599321	0.553680	0.308860	0.339819	0.509068	0.555646	0.456185	0.427696	0.088942	0.000000
